# Supplementary material for: Association of per- and polyfluoroalkyl substance exposure with fatty liver disease risk in US adults
Source: PubMed Central journal article supplement — JHEP Rep. 2023 Feb 3;5(5):100694. doi: 10.1016/j.jhepr.2023.100694 (PMC10033989; doi:10.1016/j.jhepr.2023.100694), 2023-02-03
Supplement: mmc1.pdf [file mmc1.pdf]

# **Association of per- and polyfluoroalkyl substance exposure with fatty liver disease risk in US adults**

Xinyuan Zhang, Longgang Zhao, Alan Ducatman, Chuanjie Deng, Katherine Ellen von Stackelberg, Christopher J. Danford, Xuehong Zhang

## Table of contents

|                            |   |
|----------------------------|---|
| Supplementary methods..... | 2 |
| Fig. S1.....               | 3 |
| Supplementary tables.....  | 4 |

## **Supplementary methods**

### ***Assessment of PFAS***

Substances measured were 2-(N-methyl-perfluorooctane sulfonamido) acetate, perfluorohexane sulfonate (PFHxS), n-PFOS, branched PFOS isomers, n-PFOA, branched PFOA isomers, perfluorononanoate (PFNA), perfluorodecanoate (PFDA), perfluoroundecanoate (PFUnDA), and perfluorododecanoate (PFDoA). Due to changes in the manufacture of PFAS in the US, several additional PFAS were measured in an appendix to the previous list, including perfluoro-1-heptanesulfonate (PFHpS). Total PFOS was calculated as the sum of n-PFOS and branched PFOS isomers. Total PFOA was calculated as the sum of n-PFOA and branched PFOA isomers.

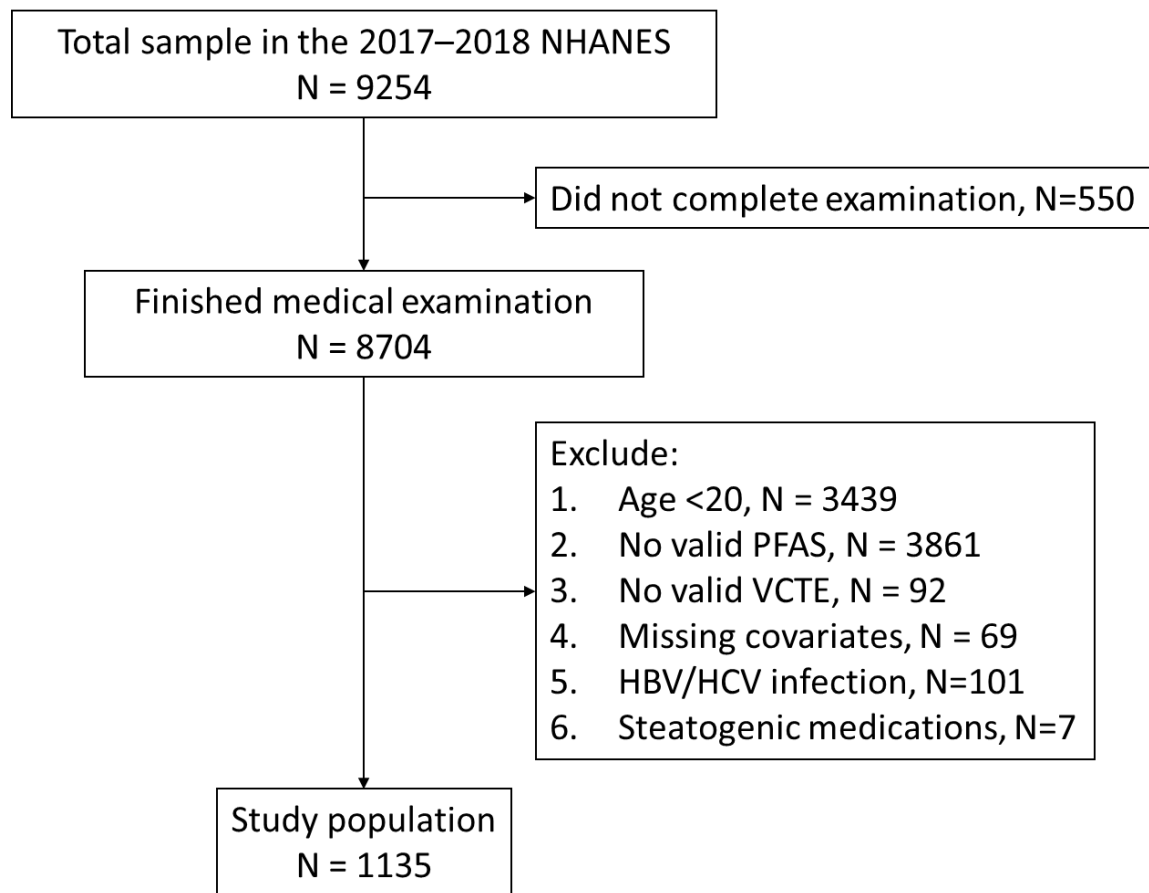

**Fig. S1. Study flowchart.**

Abbreviations: NHANES, National Health and Nutrition Examination Survey; PFAS, per- and polyfluoroalkyl substances; VCTE, vibration controlled transient elastography; HBV, hepatitis B virus; HCV, hepatitis C virus.

**Table S1. Percentage of values above the limit of detection for all per- and polyfluoroalkyl substances assessed in the NHANES 2017–2018.**

| <b>Codebook variable name</b> | <b>Sample N</b> | <b>Percentage above LOD (%)</b> | <b>Analyzed name</b> |
|-------------------------------|-----------------|---------------------------------|----------------------|
| LODPFDE                       | 1929            | 89                              | PFDA                 |
| LODPFHS                       | 1929            | 99                              | PFHxS                |
| LODMPAH                       | 1929            | 59                              | Not included         |
| LODPFNA                       | 1929            | 92                              | PFNA                 |
| LODPFUA                       | 1929            | 66                              | Not included         |
| LODNFOA                       | 1929            | 99                              | PFOA                 |
| LODBFOA                       | 1929            | 10                              |                      |
| LODNFOS                       | 1929            | 99                              | PFOS                 |
| LODMFOS                       | 1929            | 99                              |                      |
| LDDONA                        | 1929            | 13                              | Not included         |
| LDGENX                        | 1929            | 13                              | Not included         |
| LDCLPF                        | 1929            | 24                              | Not included         |
| LDFHPS                        | 1929            | 81                              | PFHpS                |
| LDPFHA                        | 1929            | 14                              | Not included         |

Abbreviations: LOD, limit of detection; PFDA, perfluorodecanoate; PFHxS, perfluorohexane sulfonate; PFNA, perfluorononanoic acid; PFOA, perfluorooctanoic acid; PFOS, perfluorooctane sulfonic acid; PFHpS, perfluoroheptane sulfonic acid.

**Table S2. Detailed stratified results for associations between serum PFAS and fatty liver disease risk according to alcohol intake.**

|                   | Never and light drinker |                  |                  |                     |                  | Heavy drinker |                  |                  |                     |                         |
|-------------------|-------------------------|------------------|------------------|---------------------|------------------|---------------|------------------|------------------|---------------------|-------------------------|
|                   | Tertile 1               | Tertile 2        | Tertile 3        | P <sub>linear</sub> | Per SD           | Tertile 1     | Tertile 2        | Tertile 3        | P <sub>linear</sub> | Per SD                  |
| <b>PFOS</b>       |                         |                  |                  |                     |                  |               |                  |                  |                     |                         |
| Median (ng/mL)    | 2.1                     | 4.9              | 10.2             |                     |                  | 2.1           | 4.7              | 10.6             |                     |                         |
| Case/non-case N   | 113/182                 | 121/176          | 131/200          |                     |                  | 29/55         | 34/46            | 18/30            |                     |                         |
| Crude model       | 1 (ref)                 | 0.85 (0.47-1.54) | 1.09 (0.60-1.97) | 0.85                | 1.02 (0.85-1.22) | 1 (ref)       | 1.97 (0.80-4.84) | 1.62 (0.44-6.02) | 0.67                | 1.07 (0.75-1.54)        |
| Adjusted model    | 1 (ref)                 | 0.77 (0.41-1.47) | 0.85 (0.42-1.74) | 0.62                | 0.95 (0.77-1.17) | 1 (ref)       | 4.17 (1.08-16.2) | 4.72 (0.73-30.6) | 0.17                | 1.47 (0.84-2.57)        |
| <b>PFOA</b>       |                         |                  |                  |                     |                  |               |                  |                  |                     |                         |
| Median (ng/mL)    | 0.8                     | 1.5              | 2.7              |                     |                  | 0.8           | 1.5              | 2.9              |                     |                         |
| Case/non-case N   | 127/196                 | 130/185          | 108/177          |                     |                  | 21/53         | 39/41            | 21/37            |                     |                         |
| Crude model       | 1 (ref)                 | 1.12 (0.63-1.98) | 0.88 (0.52-1.49) | 0.78                | 0.97 (0.75-1.25) | 1 (ref)       | 1.95 (1.00-3.82) | 1.00 (0.39-2.59) | 0.49                | 1.13 (0.78-1.65)        |
| Adjusted model    | 1 (ref)                 | 1.10 (0.66-1.82) | 0.94 (0.56-1.57) | 0.53                | 0.93 (0.75-1.16) | 1 (ref)       | 2.37 (0.62-9.03) | 2.07 (0.50-8.58) | <b>0.03</b>         | <b>1.79 (1.07-2.99)</b> |
| <b>PFHxS</b>      |                         |                  |                  |                     |                  |               |                  |                  |                     |                         |
| Median (ng/mL)    | 0.5                     | 1.2              | 2.4              |                     |                  | 0.5           | 1.1              | 2.6              |                     |                         |
| Case/non-case N   | 100/181                 | 157/200          | 108/177          |                     |                  | 21/49         | 34/48            | 26/34            |                     |                         |
| Crude model       | 1 (ref)                 | 1.37 (0.74-2.56) | 1.18 (0.73-1.88) | 0.61                | 1.03 (0.91-1.16) | 1 (ref)       | 1.67 (0.62-4.51) | 1.61 (0.46-5.69) | 0.22                | 1.21 (0.87-1.70)        |
| Adjusted model    | 1 (ref)                 | 1.28 (0.62-2.66) | 1.07 (0.63-1.80) | 0.76                | 1.02 (0.90-1.15) | 1 (ref)       | 2.41 (0.97-5.96) | 6.12 (0.76-49.1) | <b>0.01</b>         | <b>2.06 (1.17-3.65)</b> |
| <b>PFNA</b>       |                         |                  |                  |                     |                  |               |                  |                  |                     |                         |
| Median (ng/mL)    | 0.2                     | 0.5              | 0.9              |                     |                  | 0.2           | 0.4              | 0.9              |                     |                         |
| Case/non-case N   | 120/187                 | 130/192          | 115/179          |                     |                  | 35/57         | 22/43            | 24/31            |                     |                         |
| Crude model       | 1 (ref)                 | 0.92 (0.62-1.36) | 0.92 (0.57-1.48) | 0.7                 | 1.03 (0.87-1.23) | 1 (ref)       | 1.22 (0.63-2.36) | 1.05 (0.31-3.56) | 0.68                | 1.07 (0.76-1.51)        |
| Adjusted model    | 1 (ref)                 | 0.75 (0.44-1.28) | 0.75 (0.42-1.33) | 0.96                | 1.00 (0.84-1.21) | 1 (ref)       | 1.74 (0.56-5.43) | 1.89 (0.49-7.27) | 0.40                | 1.21 (0.78-1.90)        |
| <b>PFHpS</b>      |                         |                  |                  |                     |                  |               |                  |                  |                     |                         |
| Median (ng/mL)    | 0.1                     | 0.2              | 0.5              |                     |                  | 0.1           | 0.2              | 0.6              |                     |                         |
| Case/non-case N   | 93/176                  | 132/192          | 140/190          |                     |                  | 24/55         | 35/56            | 22/20            |                     |                         |
| Crude model       | 1 (ref)                 | 1.13 (0.75-1.71) | 1.58 (1.03-2.41) | 0.14                | 1.09 (0.96-1.24) | 1 (ref)       | 1.53 (0.65-3.59) | 1.83 (0.55-6.08) | 0.22                | 1.17 (0.89-1.55)        |
| Adjusted model    | 1 (ref)                 | 1.13 (0.77-1.65) | 1.03 (0.64-1.67) | 0.94                | 1.00 (0.87-1.14) | 1 (ref)       | 3.18 (0.67-15.0) | 3.90 (0.92-16.5) | <b>0.05</b>         | <b>1.44 (1.00-2.07)</b> |
| <b>PFDA</b>       |                         |                  |                  |                     |                  |               |                  |                  |                     |                         |
| Median (ng/mL)    | 0.2                     | 0.3              | 0.5              |                     |                  | 0.2           | 0.3              | 0.5              |                     |                         |
| Case/non-case N   | 254/357                 | 66/91            | 45/110           |                     |                  | 59/88         | 13/21            | 9/22             |                     |                         |
| Crude model       | 1 (ref)                 | 1.02 (0.59-1.76) | 0.57 (0.29-1.12) | 0.12                | 0.79 (0.57-1.09) | 1 (ref)       | 1.05 (0.32-3.40) | 0.61 (0.15-2.52) | 0.58                | 0.89 (0.58-1.38)        |
| Adjusted model    | 1 (ref)                 | 1.17 (0.64-2.16) | 0.86 (0.44-1.69) | 0.15                | 0.85 (0.68-1.06) | 1 (ref)       | 1.26 (0.25-6.40) | 0.89 (0.27-2.90) | 0.39                | 1.23 (0.77-1.97)        |
| <b>Total PFAS</b> |                         |                  |                  |                     |                  |               |                  |                  |                     |                         |
| Median (ng/mL)    | 4.5                     | 9.2              | 17.3             |                     |                  | 4.5           | 8.8              | 16.6             |                     |                         |
| Case/non-case N   | 115/178                 | 124/184          | 126/196          |                     |                  | 27/56         | 37/41            | 17/34            |                     |                         |

|                |         |                  |                  |      |                  |         |                  |                  |      |                  |
|----------------|---------|------------------|------------------|------|------------------|---------|------------------|------------------|------|------------------|
| Crude model    | 1 (ref) | 0.72 (0.41-1.27) | 1.01 (0.55-1.83) | 0.74 | 1.03 (0.83-1.28) | 1 (ref) | 3.26 (1.33-7.95) | 0.83 (0.26-2.69) | 0.3  | 1.22 (0.81-1.83) |
| Adjusted model | 1 (ref) | 0.66 (0.39-1.10) | 0.78 (0.39-1.55) | 0.87 | 0.98 (0.79-1.22) | 1 (ref) | 7.51 (1.81-31.2) | 3.30 (0.84-13.1) | 0.05 | 2.12 (0.99-4.54) |

Values presented from the models are odds ratio (95% confidence interval). Model was adjusted for age group (20–<40, 40–<60, ≥60 years), sex, race/ethnicity (non-Hispanic white, non-Hispanic black, Hispanic, other), ever smoker (only in analyses for never/light drinkers; yes, no), ever drink alcohol (yes, no), physical activity (min/day), body mass index (kg/m2), history of diabetes (yes, no), cancer (yes, no), hypertension (yes, no), aspirin use (yes, no), and high-fat diet (yes, no).

*p-trend* values were calculated using log-transformed continuous exposure variables.

Abbreviations: PFAS, per-and polyfluoroalkyl substances; PFOS, perfluorooctane sulfonic acid; PFOA, perfluorooctanoic acid; PFHxS, perfluorohexane sulfonate; PFNA, perfluorononanoic acid; PFHpS, perfluoroheptane sulfonic acid; PFDA, perfluorodecanoate; SD, standard deviation.

**Table S3. Associations between serum PFAS and advanced liver fibrosis according to alcohol intake.**

|            | <b>Total</b>     | <b>Never and light drinker</b> | <b>Heavy drinker</b> |
|------------|------------------|--------------------------------|----------------------|
| PFOS       | 0.97 (0.82-1.15) | 0.92 (0.76-1.11)               | 1.21 (0.72-2.04)     |
| PFOA       | 1.00 (0.84-1.20) | 0.89 (0.72-1.10)               | 1.75 (1.10-2.79)     |
| PFHxS      | 1.08 (0.95-1.22) | 0.99 (0.87-1.14)               | 1.61 (1.10-2.35)     |
| PFNA       | 1.00 (0.87-1.14) | 0.96 (0.81-1.13)               | 1.23 (0.81-1.85)     |
| PFHpS      | 1.05 (0.93-1.17) | 1.01 (0.90-1.14)               | 1.28 (0.92-1.78)     |
| PFDA       | 0.85 (0.71-1.02) | 0.80 (0.64-0.99)               | 1.25 (0.78-2.00)     |
| Total PFAS | 1.03 (0.86-1.24) | 0.94 (0.76-1.16)               | 1.74 (0.98-3.11)     |

Values presented from the models are odds ratio (95% confidence interval) per long-transformed standard deviation from ordinal logistic regression. Adjusted model included age group (20–<40, 40–<60, ≥60 years), sex, race/ethnicity (non-Hispanic whites, non-Hispanic black, Hispanic, other), ever smoker (yes, no), ever drink alcohol (yes, no), physical activity (minutes/day), body mass index (kg/m<sup>2</sup>), history of diabetes (yes, no), cancer (yes, no), hypertension (yes, no), aspirin use (yes, no), and high-fat diet (yes, no). Ever drink alcohol was not adjusted among heavy drinkers.

Abbreviations: PFAS, per- and polyfluoroalkyl substances; PFOS, perfluorooctane sulfonic acid; PFOA, perfluorooctanoic acid; PFHxS, perfluorohexane sulfonate; PFNA, perfluorononanoic acid; PFHpS, perfluoroheptane sulfonic acid; PFDA, perfluorodecanoate.

**Table S4. Stratified results for associations between serum PFAS and non-alcoholic fatty liver disease risk.**

| <b>Strata factor</b>       | <b>Subgroups</b>         | <b>PFOS</b>      | <b>PFOA</b>      | <b>PFNA</b>      | <b>PFHpS</b>     | <b>PFDA</b>      | <b>Total PFAS</b> |
|----------------------------|--------------------------|------------------|------------------|------------------|------------------|------------------|-------------------|
| <b>Sex</b>                 |                          |                  |                  |                  |                  |                  |                   |
|                            | Male                     | 1.08 (0.75-1.55) | 0.87 (0.60-1.25) | 0.99 (0.72-1.35) | 1.00 (0.83-1.21) | 0.82 (0.64-1.05) | 1.11 (0.71-1.74)  |
|                            | Female                   | 0.96 (0.70-1.34) | 1.18 (0.81-1.71) | 1.04 (0.79-1.38) | 1.09 (0.85-1.39) | 0.95 (0.69-1.29) | 1.05 (0.72-1.55)  |
|                            | <i>P for interaction</i> | 0.75             | 0.24             | 0.54             | 0.34             | 0.86             | 0.44              |
| <b>Race/ethnicity</b>      |                          |                  |                  |                  |                  |                  |                   |
|                            | Whites                   | 1.00 (0.72-1.39) | 1.00 (0.71-1.40) | 0.99 (0.78-1.26) | 1.02 (0.83-1.25) | 0.95 (0.73-1.23) | 1.03 (0.73-1.46)  |
|                            | Others                   | 1.00 (0.86-1.16) | 1.14 (0.90-1.44) | 1.08 (0.87-1.33) | 1.14 (0.96-1.35) | 0.86 (0.68-1.09) | 1.12 (0.90-1.40)  |
|                            | <i>P for interaction</i> | 0.9              | 0.44             | 0.80             | 0.33             | 0.28             | 0.46              |
| <b>Smoking</b>             |                          |                  |                  |                  |                  |                  |                   |
|                            | Non-smoker               | 1.17 (0.95-1.44) | 1.04 (0.77-1.40) | 1.11 (0.91-1.37) | 1.03 (0.89-1.20) | 1.00 (0.75-1.35) | 1.23 (0.93-1.63)  |
|                            | Smoker                   | 0.89 (0.69-1.14) | 1.08 (0.78-1.50) | 0.91 (0.71-1.15) | 1.02 (0.81-1.29) | 0.74 (0.52-1.05) | 0.95 (0.69-1.30)  |
|                            | <i>P for interaction</i> | 0.51             | 0.65             | 0.72             | 0.79             | 0.14             | 0.82              |
| <b>Obesity</b>             |                          |                  |                  |                  |                  |                  |                   |
|                            | Non-obese                | 0.86 (0.67-1.10) | 0.81 (0.54-1.22) | 0.91 (0.71-1.16) | 1.03 (0.90-1.17) | 0.69 (0.54-0.88) | 0.87 (0.63-1.21)  |
|                            | Obese                    | 1.03 (0.83-1.28) | 1.27 (0.98-1.66) | 1.17 (0.97-1.41) | 1.06 (0.88-1.27) | 1.06 (0.80-1.41) | 1.17 (0.96-1.43)  |
|                            | <i>P for interaction</i> | 0.78             | 0.12             | 0.13             | 0.66             | 0.80             | 0.18              |
| <b>Waist circumference</b> |                          |                  |                  |                  |                  |                  |                   |
|                            | WC<102(M)/88 (F) cm      | 0.91 (0.65-1.27) | 0.71 (0.48-1.06) | 0.78 (0.60-1.00) | 1.12 (0.91-1.38) | 0.63 (0.45-0.87) | 0.93 (0.62-1.39)  |
|                            | WC≥102(M)/88 (F) cm      | 0.92 (0.78-1.10) | 1.07 (0.83-1.38) | 1.09 (0.92-1.31) | 1.04 (0.87-1.24) | 0.97 (0.75-1.25) | 1.00 (0.81-1.24)  |
|                            | <i>P for interaction</i> | 0.75             | 0.47             | 0.43             | 0.88             | 0.89             | 0.58              |
| <b>High-fat diet</b>       |                          |                  |                  |                  |                  |                  |                   |
|                            | No                       | 0.93 (0.73-1.20) | 1.11 (0.80-1.54) | 1.01 (0.80-1.27) | 1.01 (0.86-1.18) | 0.90 (0.69-1.18) | 1.02 (0.74-1.40)  |
|                            | Yes                      | 1.07 (0.86-1.35) | 1.01 (0.75-1.36) | 1.03 (0.79-1.35) | 1.06 (0.86-1.30) | 0.85 (0.63-1.16) | 1.15 (0.87-1.50)  |
|                            | <i>P for interaction</i> | 0.23             | 0.57             | 0.54             | 0.40             | 0.37             | 0.10              |



| <b>hs-CRP</b>            |                  |                  |                  |                  |                  |                  |  |
|--------------------------|------------------|------------------|------------------|------------------|------------------|------------------|--|
| ≤3.0 mg/L                | 1.01 (0.76-1.34) | 0.83 (0.58-1.18) | 0.98 (0.80-1.21) | 0.99 (0.83-1.19) | 0.86 (0.67-1.10) | 0.99 (0.71-1.39) |  |
| >3.0 mg/L                | 1.03 (0.80-1.31) | 1.29 (0.98-1.70) | 1.05 (0.80-1.39) | 1.13 (0.97-1.30) | 0.92 (0.72-1.18) | 1.21 (0.93-1.56) |  |
| <i>P for interaction</i> | 0.77             | 0.03             | 0.66             | 0.22             | 0.67             | 0.16             |  |
| <b>ALT</b>               |                  |                  |                  |                  |                  |                  |  |
| ≤33 (M)/25 (F)           | 1.02 (0.84-1.23) | 1.04 (0.82-1.32) | 1.02 (0.86-1.21) | 1.05 (0.91-1.22) | 0.88 (0.73-1.07) | 1.07 (0.86-1.33) |  |
| >33 (M)/25 (F)           | 1.23 (0.95-1.60) | 1.13 (0.58-2.19) | 1.11 (0.72-1.71) | 0.94 (0.78-1.13) | 0.88 (0.62-1.24) | 1.38 (0.99-1.94) |  |
| <i>P for interaction</i> | 0.68             | 0.43             | 0.83             | 0.56             | 0.22             | 0.80             |  |

Values are odds ratio (95% confidence interval) per one standard deviation increase of log-transformed PFAS. Model was adjusted for age group (20–<40, 40–<60, ≥60 years), sex, race/ethnicity (non-Hispanic white, non-Hispanic black, Hispanic, other), ever smoker (yes, no), ever drink alcohol (yes, no), physical activity (minutes/day), body mass index (kg/m<sup>2</sup>), history of diabetes (yes, no), cancer (yes, no), hypertension (yes, no), aspirin use (yes, no), and high-fat diet (yes, no), while excluding the corresponding strata factor in each analysis.

Abbreviations: PFAS, per- and polyfluoroalkyl substances; PFOS, perfluorooctane sulfonic acid; PFOA, perfluorooctanoic acid; PFNA, perfluorononanoic acid; PFHpS, perfluoroheptane sulfonic acid; PFDA, perfluorodecanoate; M, male; F, female; hs-CRP, high-sensitivity C-reactive protein; ALT, alanine aminotransferase.

**Table S5. Sensitivity analyses on PFAS and fatty liver disease risk.**

|                                 | <b>Tertile 1 (lowest)</b> | <b>Tertile 2</b> | <b>Tertile 3 (highest)</b> | <b><i>p-trend</i></b> | <b>Per log SD</b> |
|---------------------------------|---------------------------|------------------|----------------------------|-----------------------|-------------------|
| <b>PFOS</b>                     |                           |                  |                            |                       |                   |
| Exclude N=98 history of cancers | 1 (reference)             | 1.29 (0.83-2.00) | 1.33 (0.72-2.45)           | 0.34                  | 1.10 (0.90-1.35)  |
| Exclude N=164 albuminuria       | 1 (reference)             | 1.14 (0.70-1.84) | 1.32 (0.72-2.44)           | 0.38                  | 1.08 (0.91-1.29)  |
| <b>PFOA</b>                     |                           |                  |                            |                       |                   |
| Exclude N=98 history of cancers | 1 (reference)             | 1.32 (0.84-2.08) | 1.15 (0.64-2.06)           | 0.32                  | 1.10 (0.91-1.32)  |
| Exclude N=164 albuminuria       | 1 (reference)             | 1.13 (0.72-1.78) | 1.00 (0.59-1.69)           | 0.56                  | 1.07 (0.85-1.35)  |
| <b>PFHxS</b>                    |                           |                  |                            |                       |                   |
| Exclude N=98 history of cancers | 1 (reference)             | 1.56 (0.84-2.88) | 1.49 (0.87-2.54)           | 0.01                  | 1.20 (1.04-1.37)  |
| Exclude N=164 albuminuria       | 1 (reference)             | 1.58 (0.91-2.77) | 1.71 (0.99-2.93)           | 0.009                 | 1.25 (1.06-1.47)  |
| <b>PFNA</b>                     |                           |                  |                            |                       |                   |
| Exclude N=98 history of cancers | 1 (reference)             | 0.96 (0.58-1.59) | 0.97 (0.59-1.59)           | 0.46                  | 1.06 (0.91-1.23)  |
| Exclude N=164 albuminuria       | 1 (reference)             | 0.85 (0.53-1.37) | 0.86 (0.50-1.48)           | 0.96                  | 1.00 (0.84-1.21)  |
| <b>PFHpS</b>                    |                           |                  |                            |                       |                   |
| Exclude N=98 history of cancers | 1 (reference)             | 1.53 (0.88-2.66) | 1.30 (0.69-2.44)           | 0.41                  | 1.07 (0.91-1.25)  |
| Exclude N=164 albuminuria       | 1 (reference)             | 1.53 (0.90-2.61) | 1.55 (0.97-2.50)           | 0.16                  | 1.10 (0.96-1.26)  |
| <b>PFDA</b>                     |                           |                  |                            |                       |                   |
| Exclude N=98 history of cancers | 1 (reference)             | 1.12 (0.61-2.06) | 0.81 (0.49-1.32)           | 0.14                  | 0.88 (0.75-1.04)  |
| Exclude N=164 albuminuria       | 1 (reference)             | 1.27 (0.65-2.48) | 0.93 (0.56-1.55)           | 0.49                  | 0.94 (0.78-1.12)  |
| <b>Total PFAS</b>               |                           |                  |                            |                       |                   |
| Exclude N=98 history of cancers | 1 (reference)             | 1.32 (0.77-2.26) | 1.22 (0.66-2.27)           | 0.12                  | 1.19 (0.96-1.48)  |
| Exclude N=164 albuminuria       | 1 (reference)             | 1.06 (0.60-1.89) | 1.05 (0.58-1.92)           | 0.14                  | 1.16 (0.95-1.43)  |

Values presented from the models are odds ratio (95% confidence interval). Model was adjusted for age group (20–<40, 40–<60, ≥60 years), sex, race/ethnicity (non-Hispanic white, non-Hispanic black, Hispanic, other), ever smoker (yes, no), ever drink alcohol (yes, no), physical activity (minutes/day), body mass index (kg/m<sup>2</sup>), history of diabetes (yes, no), cancer (yes, no), hypertension (yes, no), aspirin use (yes, no), and high-fat diet (yes, no).

*p-trend* values were calculated using log-transformed continuous exposure variables.

Abbreviations: PFAS, per-and polyfluoroalkyl substances; PFOS, perfluorooctane sulfonic acid; PFOA, perfluorooctanoic acid; PFHxS, perfluorohexane sulfonate; PFNA, perfluorononanoic acid; PFHpS, perfluoroheptane sulfonic acid; PFDA, perfluorodecanoate; SD, standard deviation.

**Table S6. Linear regression coefficients  $\beta$  (denoted by significance) of log-transformed PFAS and liver function biomarkers stratified by obesity.**

|                   | <b>AST</b> | <b>ALT</b> | <b>ALP</b> | <b>GGT</b> | <b>Bilirubin</b> | <b>hs-CRP</b> | <b>Albumin</b> |
|-------------------|------------|------------|------------|------------|------------------|---------------|----------------|
| <b>PFOS</b>       |            |            |            |            |                  |               |                |
| Non-obese         | 0.023      | 0.025      | 0.03       | 0.03       | 0.045            | -0.027        | 0.014*         |
| Obese             | 0.043      | 0.028      | -0.031     | -0.003     | 0.061            | -0.204*       | 0.022*         |
| <b>PFOA</b>       |            |            |            |            |                  |               |                |
| Non-obese         | 0.076*     | 0.078      | 0.03       | 0.088      | 0.087*           | -0.09         | 0.026*         |
| Obese             | 0.047      | 0.048      | -0.007     | 0.094      | 0.094            | -0.06         | 0.026*         |
| <b>PFHxS</b>      |            |            |            |            |                  |               |                |
| Non-obese         | 0.056*     | 0.064      | 0.027      | 0.045      | 0.024            | -0.001        | 0.018*         |
| Obese             | 0.032      | 0.026      | -0.032     | 0.014      | 0.084            | -0.143        | 0.029*         |
| <b>PFNA</b>       |            |            |            |            |                  |               |                |
| Non-obese         | 0.063*     | 0.077      | 0.041      | 0.067      | 0.045            | -0.036        | 0.014*         |
| Obese             | 0.022      | 0.026      | 0.021      | 0.105      | 0.011            | -0.006        | 0.013*         |
| <b>PFHpS</b>      |            |            |            |            |                  |               |                |
| Non-obese         | -0.028     | -0.026     | 0.004      | -0.033     | 0.042            | 0.029         | 0.007          |
| Obese             | 0.053      | 0.089*     | -0.019     | 0.031      | -0.006           | -0.036        | 0.01           |
| <b>PFDA</b>       |            |            |            |            |                  |               |                |
| Non-obese         | 0.041      | 0.059      | 0.018      | 0.09       | 0.061            | -0.133        | 0.012          |
| Obese             | 0.009      | 0.012      | -0.041     | 0.095      | -0.005           | -0.25         | 0.018*         |
| <b>Total PFAS</b> |            |            |            |            |                  |               |                |
| Non-obese         | 0.023      | 0.025      | 0.03       | 0.03       | 0.045            | -0.027        | 0.014*         |
| Obese             | 0.043      | 0.028      | -0.031     | -0.003     | 0.061            | -0.204*       | 0.022*         |

Adjusted model included age group (20–<40, 40–<60,  $\geq$ 60 years), sex, race/ethnicity (non-Hispanic white, non-Hispanic black, Hispanic, other), ever smoker (yes, no), ever drink alcohol (yes, no), physical activity (minutes/day), history of diabetes (yes, no), cancer (yes, no), hypertension (yes, no), aspirin use (yes, no), and high-fat diet (yes, no).

\*  $p < 0.05$ .

\*\*  $p < 0.001$ .

Abbreviations: PFAS, per- and polyfluoroalkyl substances; HDL, high-density lipoproteins; LDL, low-density lipoproteins; LDL, low-density lipoproteins; HbA1c, hemoglobin A1c; PFOS, perfluorooctane sulfonic acid; PFOA, perfluorooctanoic acid; PFHxS, perfluorohexane sulfonate; PFNA, perfluorononanoic acid; PFHpS, perfluoroheptane sulfonic acid; PFDA, perfluorodecanoate.

**Table S7. Linear regression coefficients of log-transformed PFAS and other serum biomarkers.**

|                   | <b>Triglyceride</b><br>N = 546 | <b>LDL</b><br>N = 535 | <b>HDL</b><br>N = 1134 | <b>Cholesterol</b><br>N = 1134 | <b>Glucose</b><br>N = 546 | <b>Insulin</b><br>N = 546 | <b>HbA1c</b><br>N = 1134 |
|-------------------|--------------------------------|-----------------------|------------------------|--------------------------------|---------------------------|---------------------------|--------------------------|
| <b>PFOS</b>       | 0.057                          | 0.019                 | -0.009                 | 0.035*                         | 0.027                     | -0.07                     | 0.014*                   |
| <b>PFOA</b>       | 0.02                           | 0.032                 | 0.027                  | 0.042*                         | -0.002                    | -0.205*                   | -0.001                   |
| <b>PFHxS</b>      | 0.068                          | 0.033                 | -0.014                 | 0.023                          | 0.006                     | -0.125                    | < 0.001                  |
| <b>PFNA</b>       | 0.031                          | 0.039                 | 0.021                  | 0.04**                         | 0.02                      | -0.087                    | 0.013*                   |
| <b>PFHpS</b>      | 0.083                          | 0.019                 | -0.016                 | 0.02                           | 0.028                     | 0.035                     | 0.011                    |
| <b>PFDA</b>       | -0.062                         | 0.024                 | 0.068*                 | 0.045*                         | -0.003                    | -0.166*                   | -0.004                   |
| <b>Total PFAS</b> | 0.056                          | 0.033                 | -0.003                 | 0.043*                         | 0.023                     | -0.125                    | 0.011                    |

Adjusted model included age group (20–<40, 40–<60, ≥60 years), sex, race/ethnicity (non-Hispanic white, non-Hispanic black, Hispanic, other), ever smoker (yes, no), ever drink alcohol (yes, no), physical activity (min/day), body mass index (kg/m<sup>2</sup>), history of diabetes (yes, no), cancer (yes, no), hypertension (yes, no), aspirin use (yes, no), and high-fat diet (yes, no).

\*  $p < 0.05$ .

\*\*  $p < 0.001$ .

Abbreviations: PFAS, per- and polyfluoroalkyl substances; HDL, high-density lipoproteins; LDL, low-density lipoproteins; LDL, low-density lipoproteins; HbA1c, hemoglobin A1c; PFOS, perfluorooctane sulfonic acid; PFOA, perfluorooctanoic acid; PFHxS, perfluorohexane sulfonate; PFNA, perfluorononanoic acid; PFHpS, perfluoroheptane sulfonic acid; PFDA, perfluorodecanoate.
